# Supplementary material for: Genomic predictions and genome-wide association studies based on RAD-seq of quality-related metabolites for the genomics-assisted breeding of tea plants
Source: PubMed Central journal article supplement (PMC7562905; doi:10.1038/s41598-020-74623-7), 2020-10-15
Supplement: 41598_2020_74623_MOESM1_ESM.pdf [file 41598_2020_74623_MOESM1_ESM.pdf]

# Supplementary Information

Genomic predictions and genome-wide association studies based on RAD-seq of quality-related metabolites for the genomics-assisted breeding of tea plants

Hiroto Yamashita, Tomoki Uchida, Yasuno Tanaka, Hideyuki Katai, Atsushi J. Nagano, Akio Morita, Takashi Ikka

\*Corresponding author

Email: [ikka.takashi@shizuoka.ac.jp](mailto:ikka.takashi@shizuoka.ac.jp) (TI)

## This PDF file includes:

Supplementary Figure S1. Correlations of tea quality-related metabolites in 150 accessions between 2018 and 2019. NS; Not significant ( $P > 0.01$ )

Supplementary Figure S2. Distribution of genome-wide SNPs in the tea chromosome-scale genome. UA; Un-anchored SNPs.

Supplementary Figure S3. Genetic structure analyses using 9,523 SNPs among 150 tea accessions. Estimated genetic structure for  $K = 2$  and  $K = 3$  by fastSTRUCTURE (A). Plot of first and second principal components computed by PCA (B). Dendrogram of Ward's hierarchical clustering based on Euclidean distance (C).

Supplementary Figure S4. QQ-plots from a GWAS based on the MLM (A) and GLM (B) of five phenotypes of tea quality-related metabolites.

Supplementary Figure S5. Correlation matrix between tea quality-related metabolites.

## Supplementary Data file includes:

Supplementary Table S1. List of candidate genes linked to the top 80 SNPs in a GWAS of EC content.

Supplementary Table S2. List of candidate genes linked to the top 140 SNPs in a GWAS of ECG content.

Supplementary Table S3. List of candidate genes linked to the top 140 SNPs in a GWAS of EGCG content.

Supplementary Table S4. List of candidate genes linked to the top 140 SNPs in a GWAS of total catechin content.

Supplementary Table S5. List of candidate genes linked to the top 160 SNPs in a GWAS of caffeine content.

Supplementary Table S6. Tea accessions used in this study.

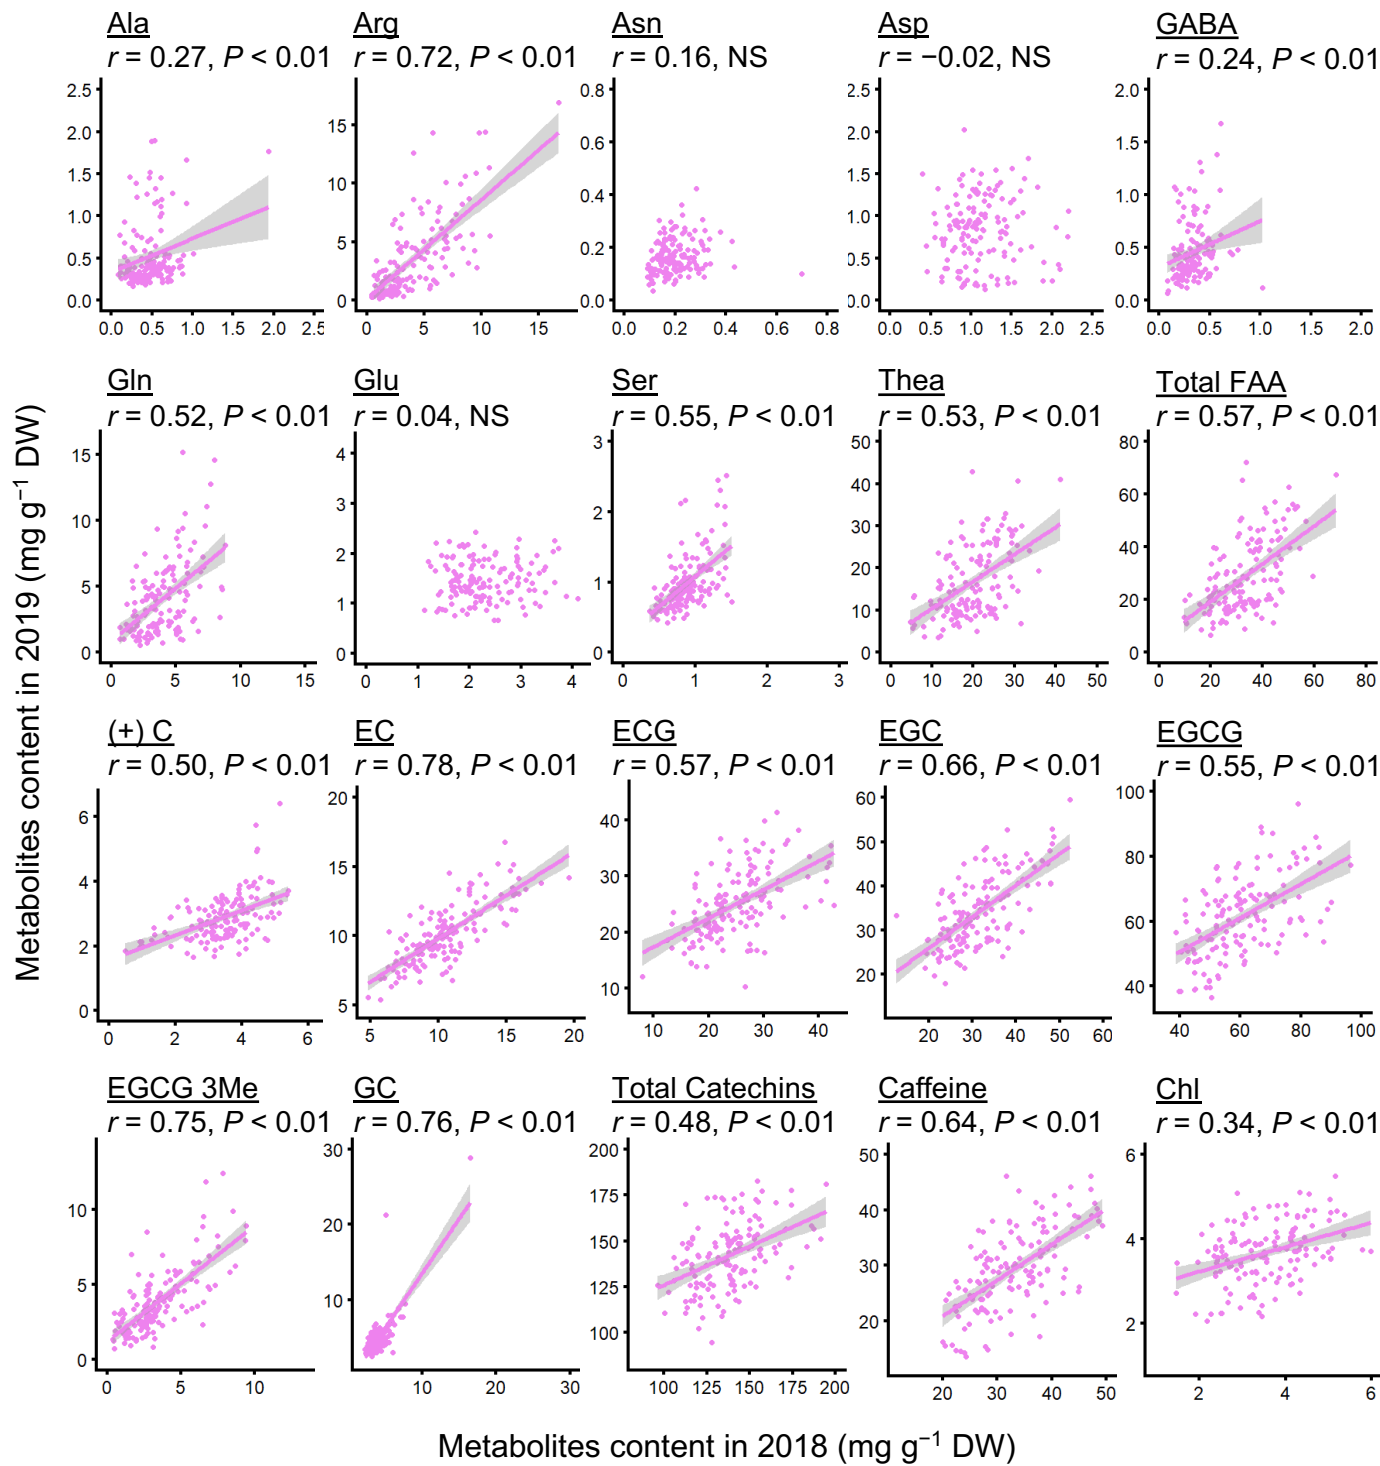

**Supplementary Figure S1.** Correlations of tea quality-related metabolites in 150 accessions between 2018 and 2019.

NS; Not significant ( $P > 0.01$ )

## Genetic map

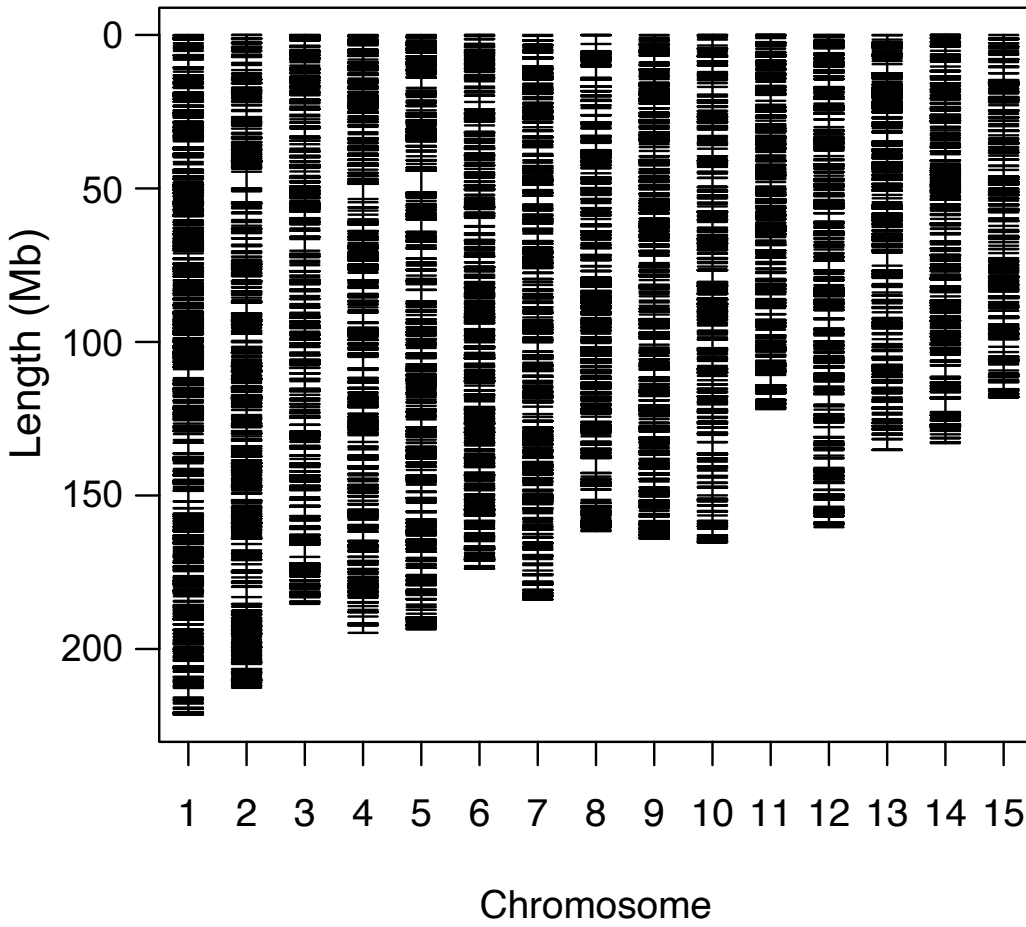

| Chr   | Number of SNPs |
|-------|----------------|
| 1     | 911            |
| 2     | 781            |
| 3     | 571            |
| 4     | 606            |
| 5     | 626            |
| 6     | 612            |
| 7     | 609            |
| 8     | 541            |
| 9     | 639            |
| 10    | 480            |
| 11    | 485            |
| 12    | 521            |
| 13    | 493            |
| 14    | 446            |
| 15    | 380            |
| UA    | 822            |
| Total | 9,523          |

**Supplementary Figure S2.** Distribution of genome-wide SNPs in tea chromosome-scale genome. UA; Un-anchored SNPs.

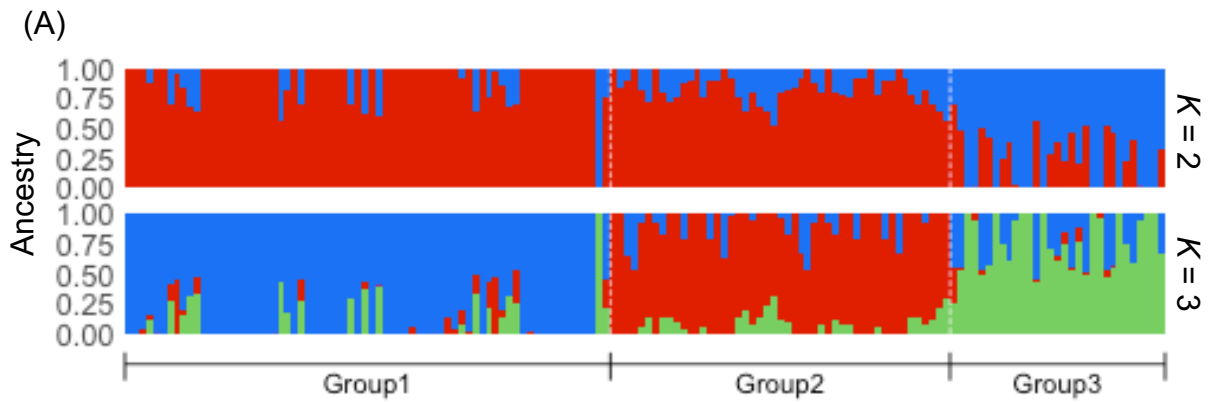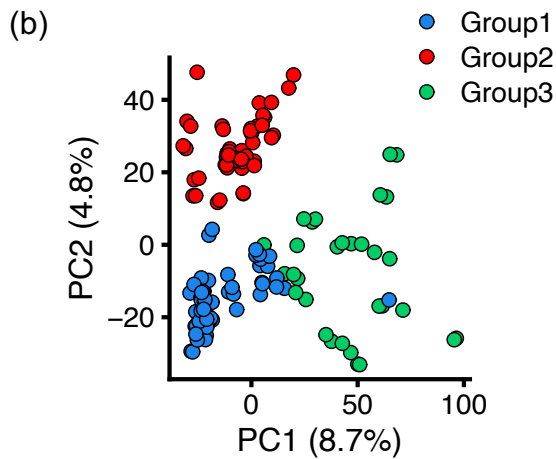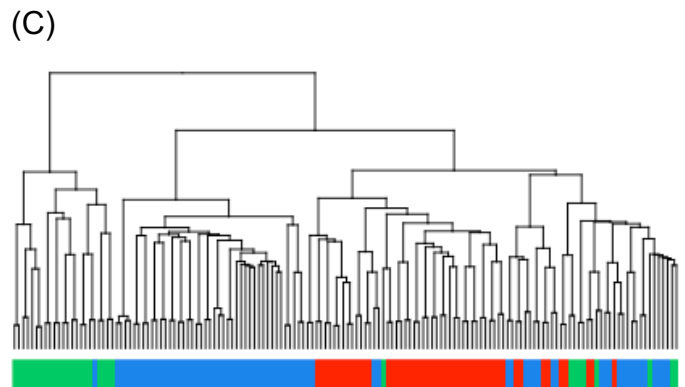

**Supplementary Figure S3.** Genetic structure analyses using 9,523 SNPs among 150 tea accessions. Estimated genetic structure for  $K = 2$  and  $K = 3$  by fastSTRUCTURE (A). Plot of first and second principal components computed by PCA (B). Dendrogram of Ward's hierarchical clustering based on Euclidean distance (C).

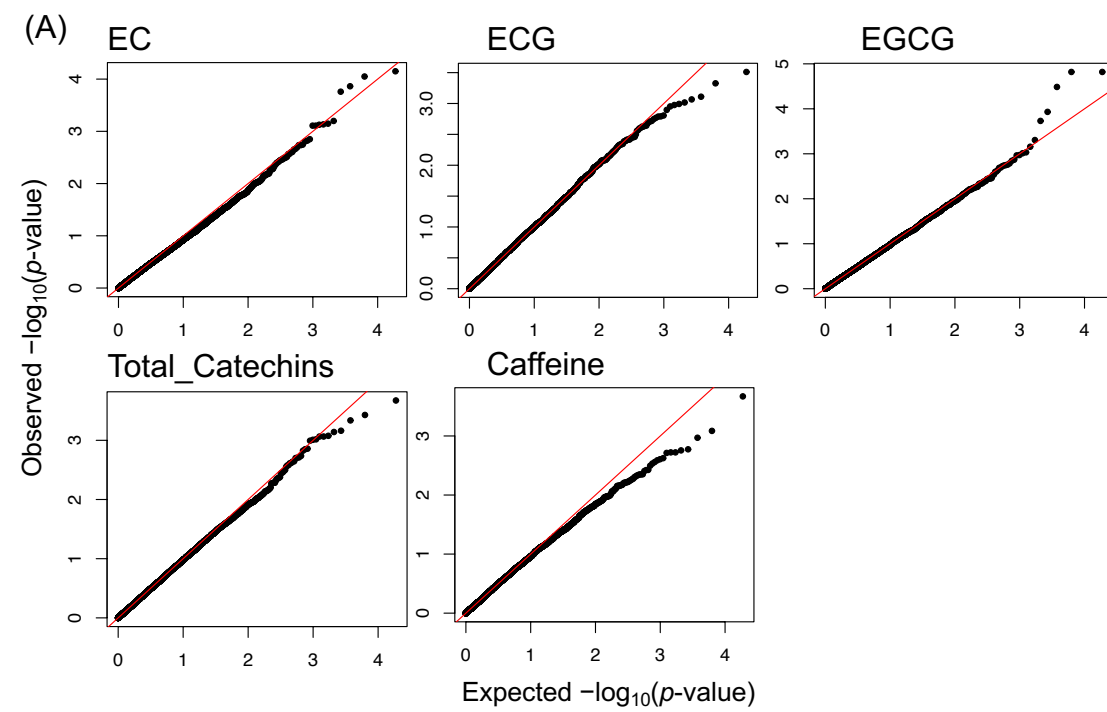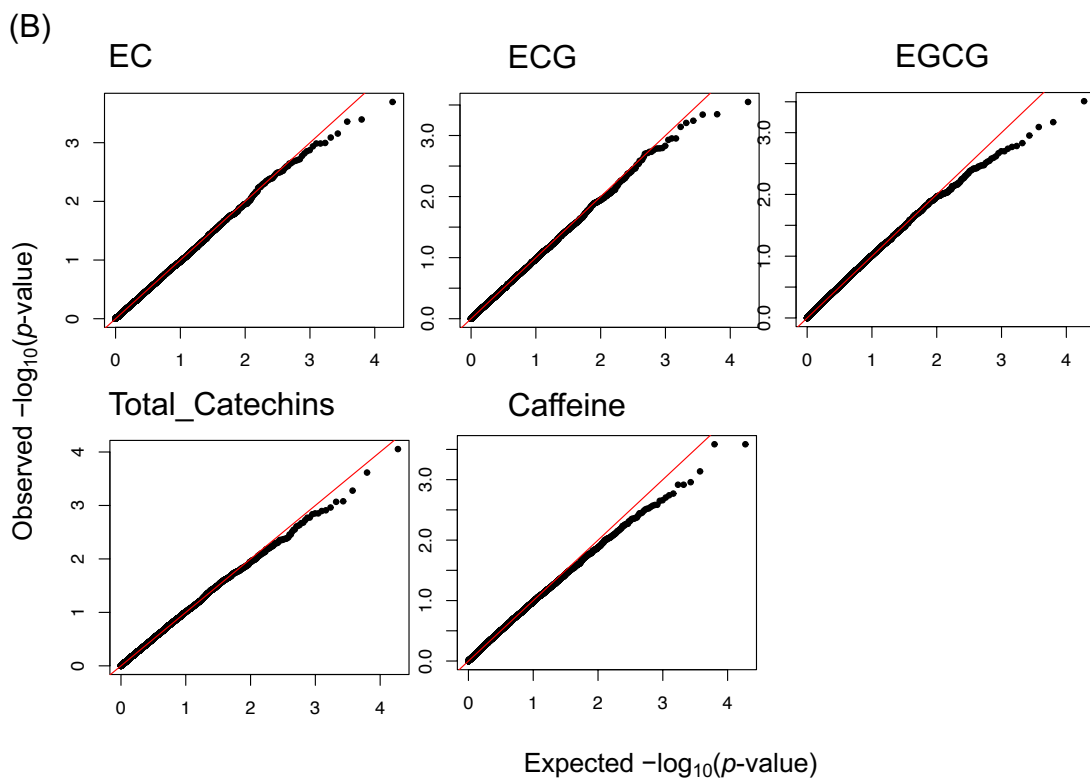

**Supplementary Figure S4.** QQ-plots from a GWAS based on the MLM (A) and GLM (B) of five phenotypes of tea quality-related metabolites.

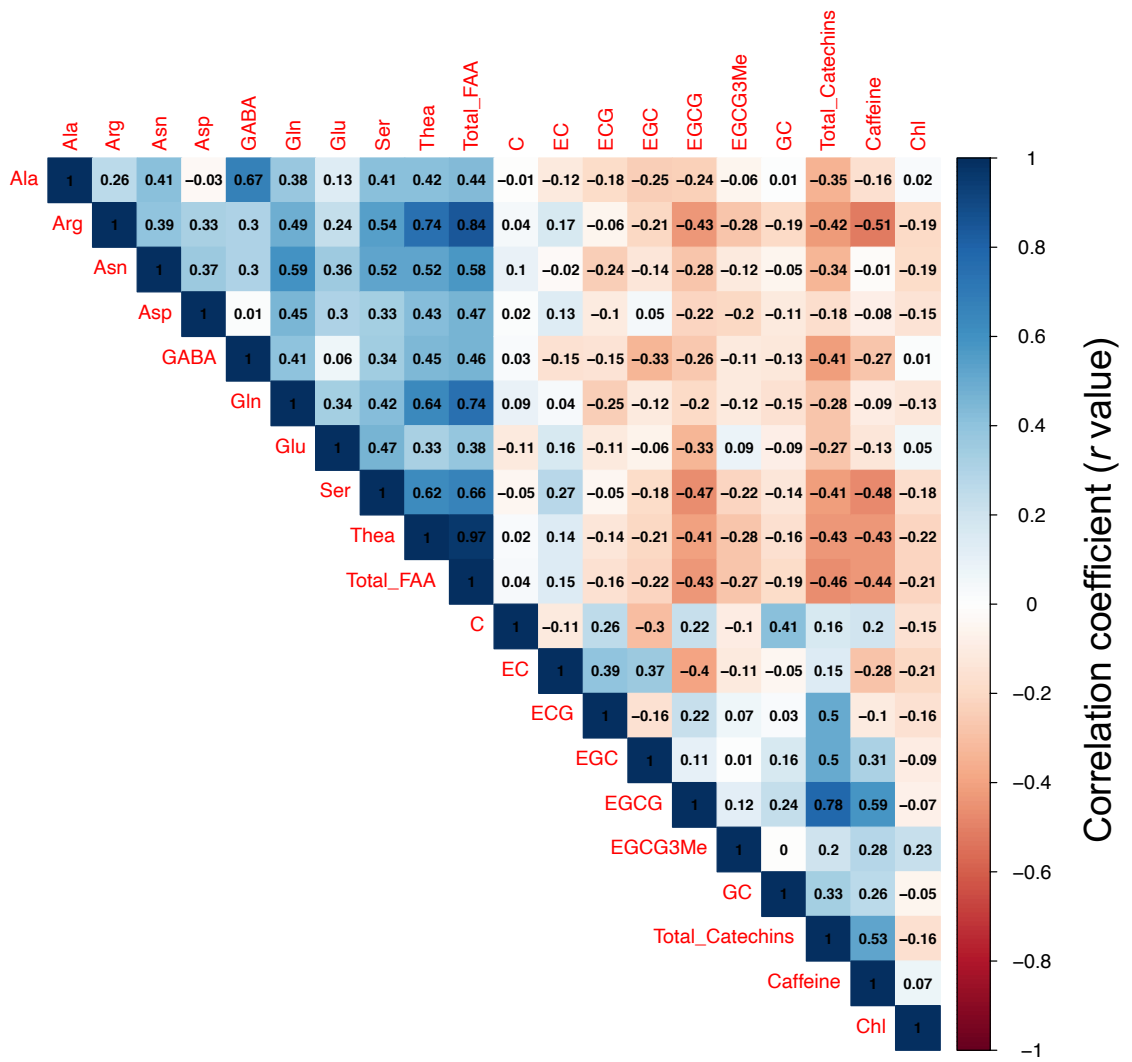

Supplementary Figure S5. Correlation matrix between tea quality-related metabolites.
